# Supplementary material for: CD4 downregulation precedes Env expression and protects HIV-1-infected cells from ADCC mediated by non-neutralizing antibodies
Source: PubMed Central journal article supplement (PMC11559134; doi:10.1128/mbio.01827-24), 2024-10-07
Supplement: mbio.01827-24-s0001.pdf [file mbio.01827-24-s0001.pdf]

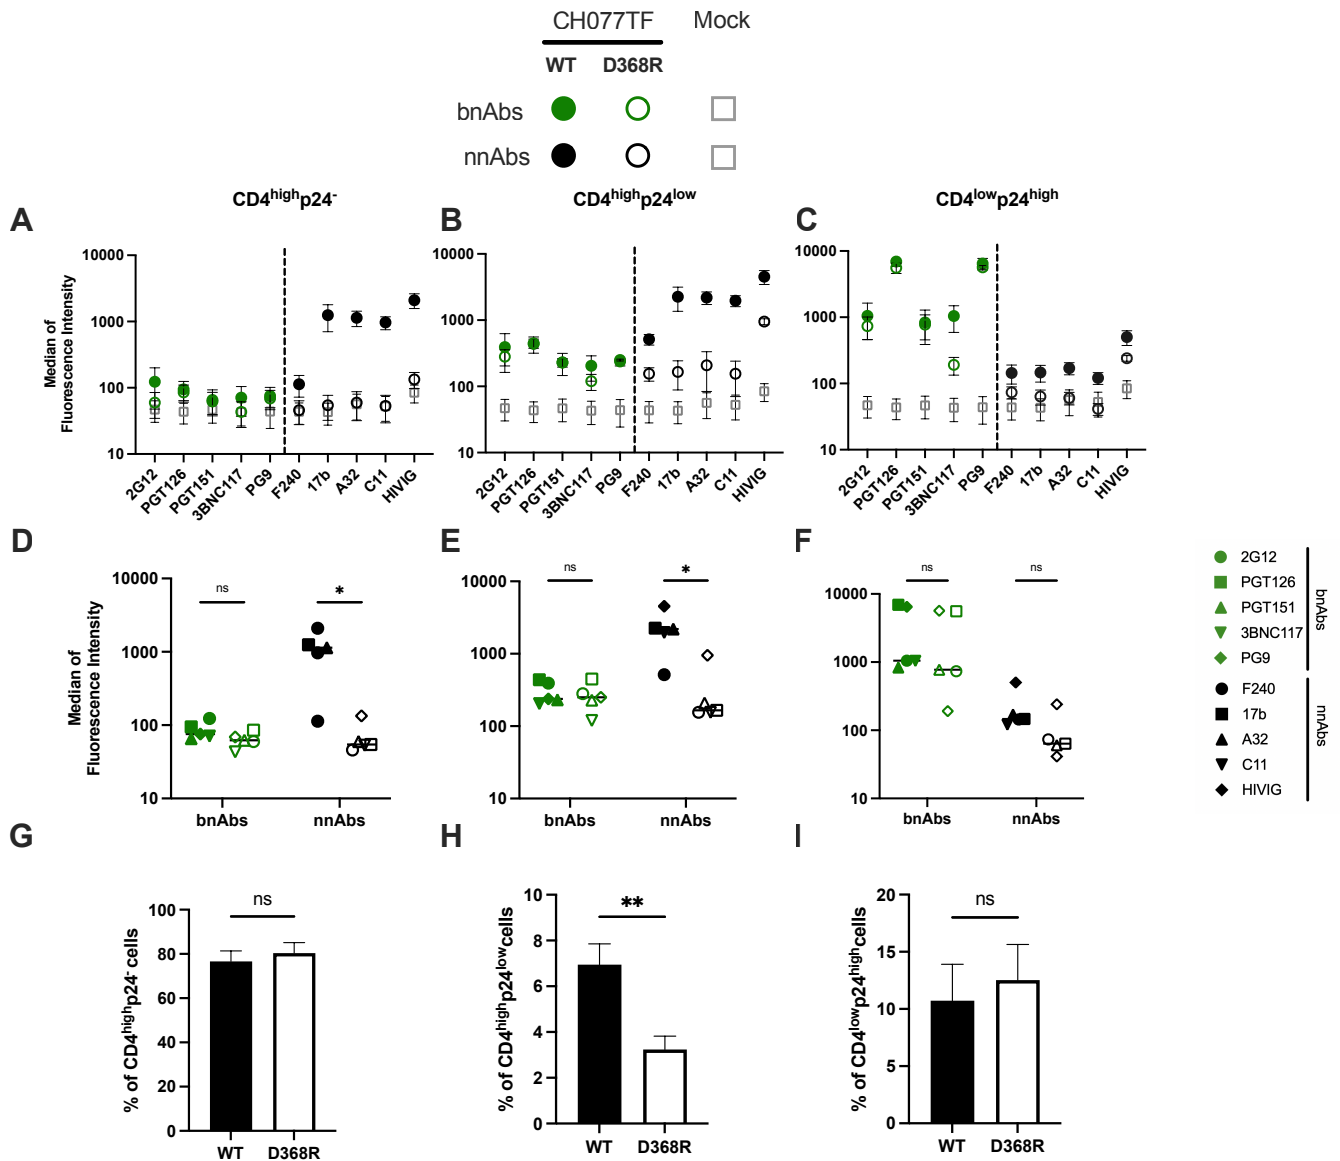

**Supplemental Fig. 1. Impact of the D368R mutation on nnAbs and bnAbs binding.**

Primary  $CD4^{+}$  T cells, mock-infected or infected with the transmitted-founder virus CH077, either expressing the wild-type (WT) or D368R Env (D368R) were stained with a panel of bnAbs and nnAbs, followed with appropriate secondary Abs. Cells were then stained for cell-surface  $CD4$  prior detection of intracellular HIV-1 p24. (A) Graphs shown represent the median fluorescence intensities (MFI) obtained for at least 3 independent staining with the different mAbs. Error bars indicate means  $\pm$  standard errors of the means. (B) Graphs shown represent the mean MFI obtained with each mAbs. (C) Percentage of the different cell populations at 48h post-infection. Statistical significance was tested using Mann-Whitney U test (\*\*  $p < 0.01$ , ns: non-significant).

○ mock   ● BaL   ● NL4.3   ● CH40   ● CH58   ● YU2   ● SF162

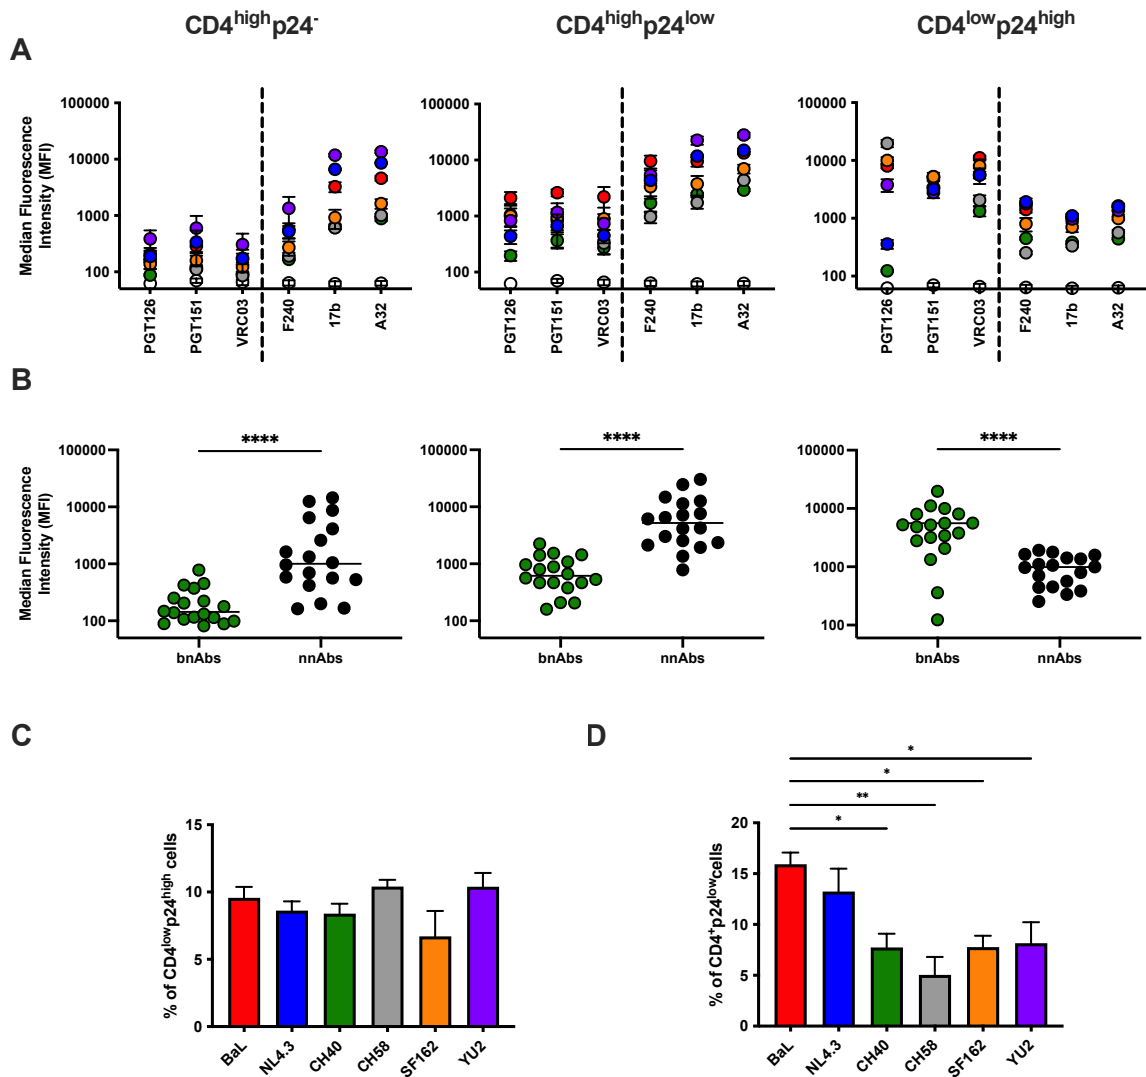

**Supplemental Fig. 2. Recognition of cells infected with HIV-1 constructs expressing lab-adapted and primary Envs by bnAbs and nnAbs.**

Primary CD4<sup>+</sup> T cells, mock-infected or infected with NL4.3 infectious molecular clones (IMC) expressing Env from lab-adapted (BaL, NL4.3) or primary (CH040TF, CH058, YU2, SF162) viruses were stained with a panel of bnAbs and nnAbs, followed with appropriate secondary Abs. Cells were then stained for cell-surface CD4 prior detection of intracellular HIV-1 p24. (A) Graphs shown represent the median fluorescence intensities (MFI) obtained for at least 3 independent staining with the different mAbs. Error bars indicate means  $\pm$  standard errors of the means. (B) Graphs shown represent the mean MFI obtained with each mAbs for each HIV-1 IMC. (C-D) Percentage of the (C) CD4<sup>low</sup>p24<sup>high</sup> and (D) CD4<sup>high</sup>p24<sup>low</sup> populations at 48h post-infection. Statistical significance was tested Mann-Whitney U test (\* p<0.05, \*\* p<0.01, \*\*\*\* p<0.0001).

A

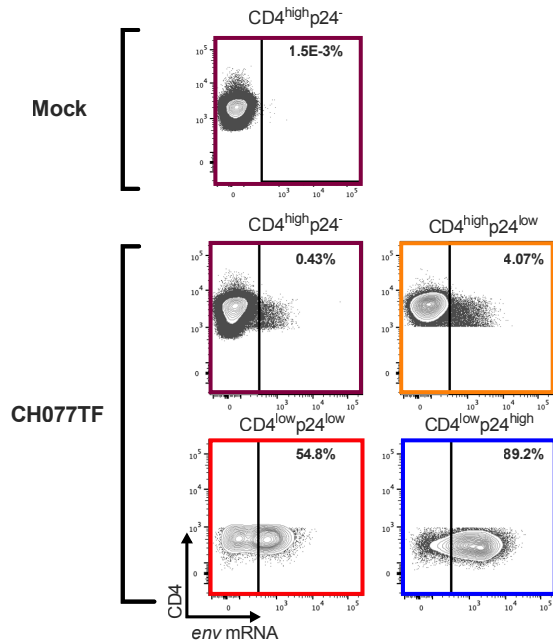

B

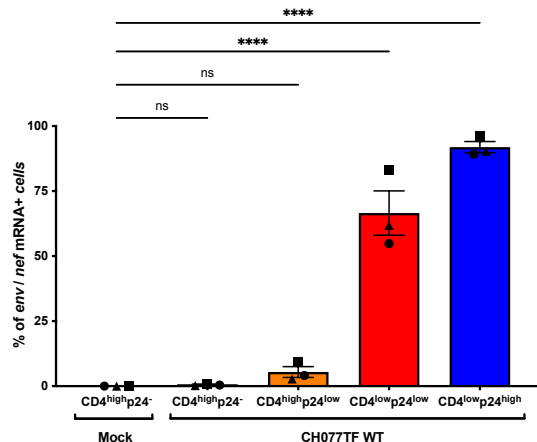

### Supplemental Fig. 3. CD4 downregulation precedes Env expression.

Primary CD4+ T cells, mock-infected or infected with the transmitted-founder virus CH077 WT were stained for cell-surface CD4 prior detection of intracellular HIV-1 p24 and Env mRNA and nef mRNA by RNA-flow FISH. (A) Example of RNA-flow FISH detection of *env* mRNA among the CD4<sup>high</sup>p24<sup>-</sup>, CD4<sup>high</sup>p24<sup>low</sup>, CD4<sup>low</sup>p24<sup>low</sup> or CD4<sup>low</sup>p24<sup>high</sup> cell populations. (C) Quantification of the percentage of *env* mRNA+ cells detected among the different cell population with three different donors. Statistical significance was tested using one way ANOVA with a Holm-Sidak post-test (\* p<0.05, \*\* p<0.01, ns: non-significant).

A

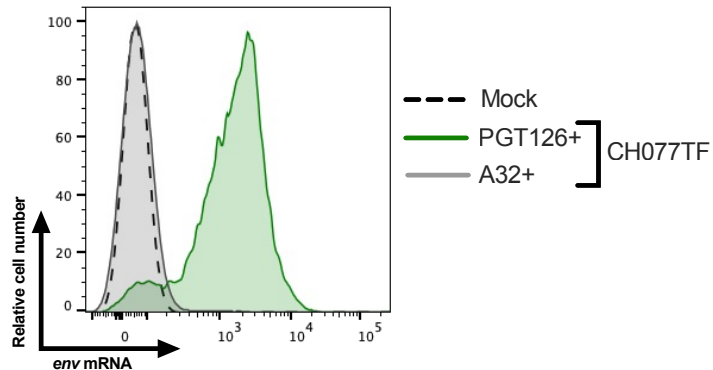

B

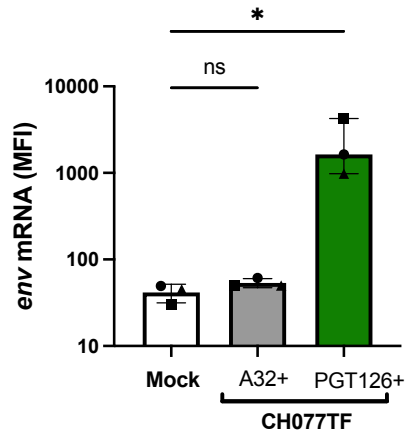

#### Supplemental Fig. 4. Cells targeted by A32 are *env* mRNA negative.

Primary CD4<sup>+</sup> T cells, mock-infected or infected with the transmitted-founder virus CH077 WT were stained with A32 or PGT126, followed with appropriate secondary Abs prior detection of intracellular *env* mRNA by RNA-flow FISH. (A) Histograms depicting representative *env* mRNA detection on A32<sup>+</sup> or PGT126<sup>+</sup> cells. (B) Median fluorescence intensities (MFI) of *env* mRNA obtained with 3 different donors. Statistical significance was tested using a Kruskal-Wallis test with a Dunn's post-test. (\*  $p < 0.05$ , ns: non-significant)

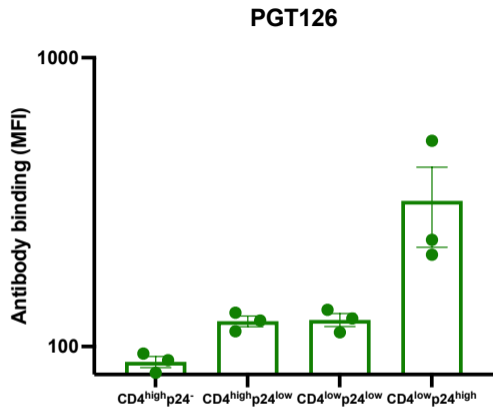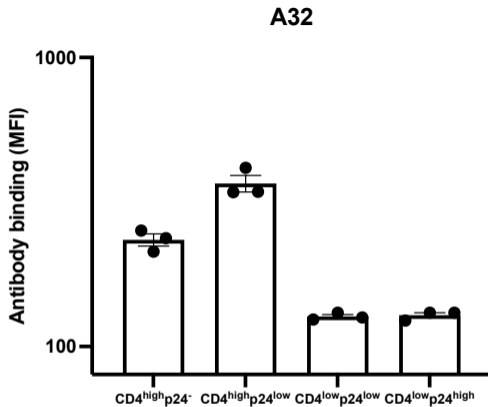

**Supplemental Fig. 5. mAbs binding based on CD4 and p24 detection.**

Primary CD4<sup>+</sup> T cells, mock-infected or infected with the transmitted-founder virus CH077 WT were stained for cell-surface CD4, A32 and PGT126 prior detection of intracellular HIV-1 p24 and *env* mRNA and *nef* mRNA by RNA-flow FISH. Shown are the levels of A32 and PGT126 binding among the CD4<sup>high</sup>p24<sup>-</sup>, CD4<sup>high</sup>p24<sup>low</sup>, CD4<sup>low</sup>p24<sup>low</sup> or CD4<sup>low</sup>p24<sup>high</sup> cell populations using the same gating strategy presented in Fig. 3A.

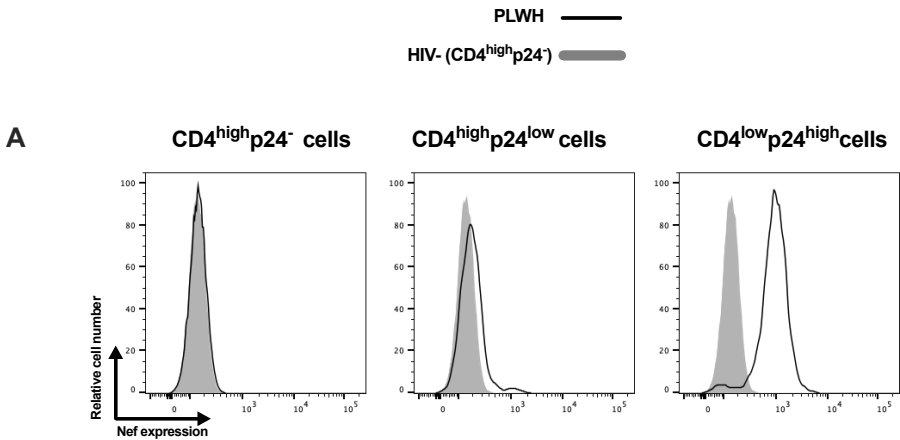

**B**

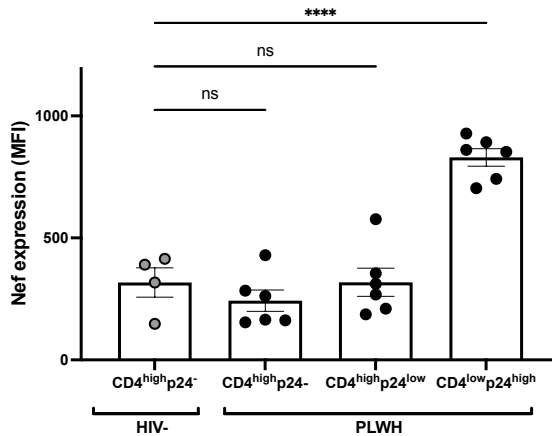

**Supplemental Fig. 6. Nef expression in ex vivo expanded CD4<sup>+</sup> T cells isolated from PLWH.**

Ex vivo expanded CD4<sup>+</sup> T cells from 6 PLWH and 4 HIV- individuals were stained for surface CD4 prior to detection of intracellular Nef and p24. (A) Histograms depicting representative staining. (B) Median fluorescence intensities (MFI) obtained with 6 PLWH and 4 HIV- individuals. Statistical significance was tested using one-way ANOVA test with a Holm-Sidak post-test (\*\*\*\*  $p < 0.0001$ , ns: non-significant).

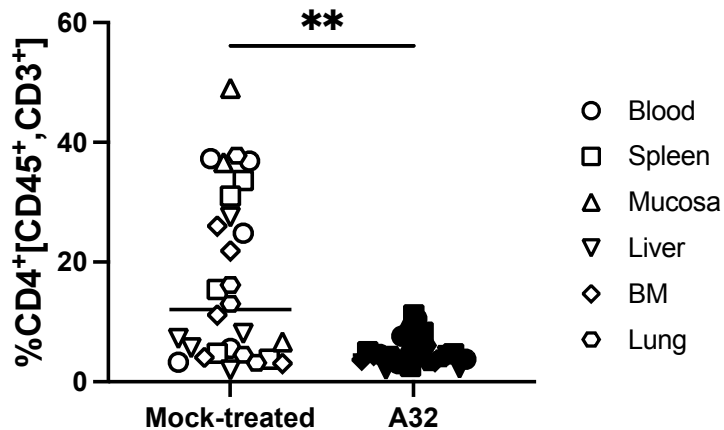

**Supplemental Fig. 7. A32 reduces the levels of CD4+ T cells in tissues in vivo.**

NSG-15-Hu-PBL mice were infected with HIV-1 JRCSF intraperitoneally. At day 6 and 9 post infection, mice were administered 1.5 mg of A32 mAb subcutaneously (s.c.). The percentage of CD4+ T cells was evaluated by flow cytometry in blood, spleen, mucosa, liver, bone marrow (BM) and lung at day 11 post-infection. Statistical significance was tested using a Mann Whitney U test (\*\* p<0.01).
